# Supplementary material
Source: PubMed Central journal article supplement (PMC3853125)
Supplement: NIHMS519858-supplement-1.pdf [file NIHMS519858-supplement-1.pdf]

509 **Appendix**

510

511 Optimized gains for the three controller architectures. G1 is shoulder angle gain; G2 is  
 512 elbow angle gain; G3 is shoulder angular velocity gain; and G4 is elbow angular velocity  
 513 gain.

514

515 24-parameter controller

| <b>muscle</b>        | <b>G1 (rad<sup>-1</sup>)</b> | <b>G2(rad<sup>-1</sup>)</b> | <b>G3(rad<sup>-1</sup> s)</b> | <b>G4(rad<sup>-1</sup> s)</b> |
|----------------------|------------------------------|-----------------------------|-------------------------------|-------------------------------|
| Anterior Deltoid     | -1.018                       | 0.332                       | -0.157                        | -0.015                        |
| Posterior Deltoid    | 1.134                        | 0.156                       | 0.179                         | 0.057                         |
| Brachialis           | -0.007                       | -1.186                      | -0.032                        | -0.103                        |
| Triceps (short head) | -0.174                       | 1.032                       | 0.011                         | 0.076                         |
| Triceps (long head)  | 0.491                        | 0.975                       | 0.118                         | 0.089                         |
| Biceps               | -0.434                       | -0.722                      | -0.099                        | -0.070                        |

516

517 16-parameter controller

| <b>muscle</b>        | <b>G1 (rad<sup>-1</sup>)</b> | <b>G2(rad<sup>-1</sup>)</b> | <b>G3(rad<sup>-1</sup> s)</b> | <b>G4(rad<sup>-1</sup> s)</b> |
|----------------------|------------------------------|-----------------------------|-------------------------------|-------------------------------|
| Anterior Deltoid     | -1.021                       | 0                           | -0.152                        | 0                             |
| Posterior Deltoid    | 1.111                        | 0                           | 0.148                         | 0                             |
| Brachialis           | 0                            | -1.319                      | 0                             | -0.094                        |
| Triceps (short head) | 0                            | 1.040                       | 0                             | 0.072                         |
| Triceps (long head)  | 0.456                        | 0.929                       | 0.093                         | 0.086                         |
| Biceps               | -0.493                       | -0.676                      | -0.098                        | -0.077                        |

518

519 2-parameter controller

| <b>muscle</b>        | <b>G1 (rad<sup>-1</sup>)</b> | <b>G2(rad<sup>-1</sup>)</b> | <b>G3(rad<sup>-1</sup> s)</b> | <b>G4(rad<sup>-1</sup> s)</b> |
|----------------------|------------------------------|-----------------------------|-------------------------------|-------------------------------|
| Anterior Deltoid     | -0.962                       | 0                           | -0.128                        | 0                             |
| Posterior Deltoid    | 0.962                        | 0                           | 0.128                         | 0                             |
| Brachialis           | 0                            | -0.962                      | 0                             | -0.128                        |
| Triceps (short head) | 0                            | 0.962                       | 0                             | 0.128                         |
| Triceps (long head)  | 0.962                        | 0.962                       | 0.128                         | 0.128                         |
| Biceps               | -0.962                       | -0.962                      | -0.128                        | -0.128                        |

520

521

522

523

524
